# Supplementary material
Source: publisher figshare collection journal article supplement (https://acs.figshare.com/ndownloader/files/22256670)
Supplement: Supplementary file 1 [file 22256670]

# Supporting Information

## Synthesis of Intermetallic Pt-based Catalysts by Lithium - Naphthalenide - Driven Reduction for Selective Hydrogenation of Cinnamaldehyde

Xiao Chen,<sup>a</sup> He Cao,<sup>a</sup> Xiaozhen Chen,<sup>a</sup> Yan Du,<sup>a</sup> Ji Qi,<sup>a</sup> Jingjie Luo,<sup>a</sup> Marc Armbrüster<sup>b</sup> and  
Changhai Liang<sup>\*a</sup>

<sup>a.</sup> *State Key Laboratory of Fine Chemicals, Laboratory of Advanced Materials and  
Catalytic Engineering, School of Chemical Engineering, Dalian University of Technology,  
Dalian 116024, China. E-mail: changhai@dlut.edu.cn.*

<sup>b.</sup> *Faculty of Natural Sciences, Institute of Chemistry, Materials for Innovative Energy  
Concepts, Chemnitz University of Technology, Chemnitz 09107, Germany*

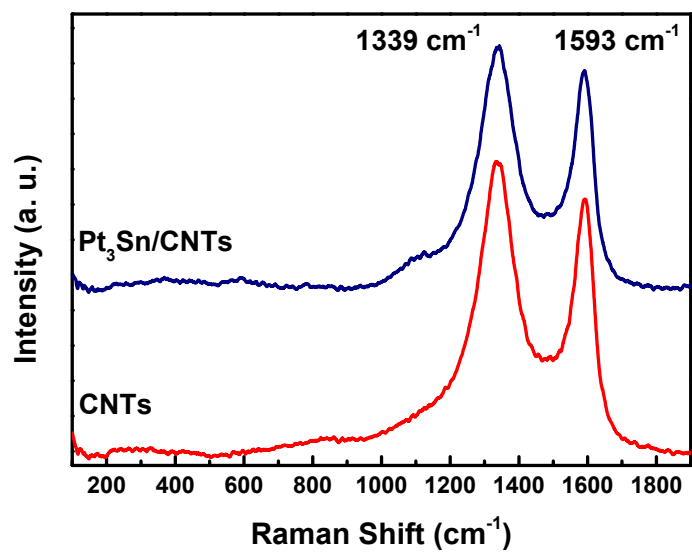

**Figure S1** Raman spectra of CNTs with and without depositing Pt<sub>3</sub>Sn.

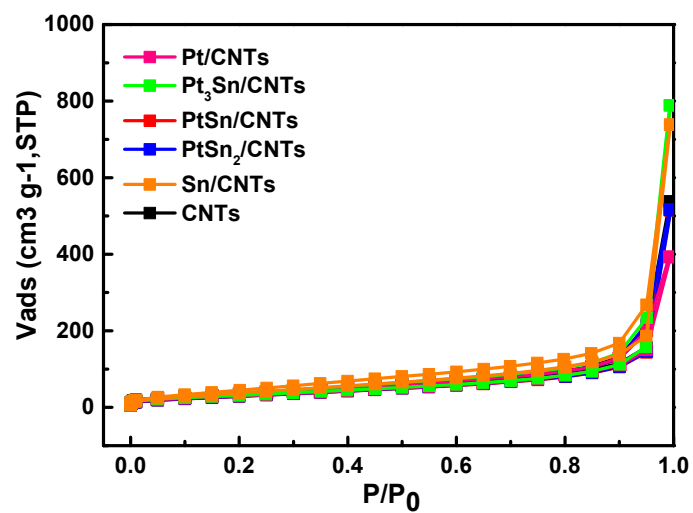

**Figure S2** N<sub>2</sub> adsorption-desorption isotherms of CNTs and Pt-Sn/CNTs samples.

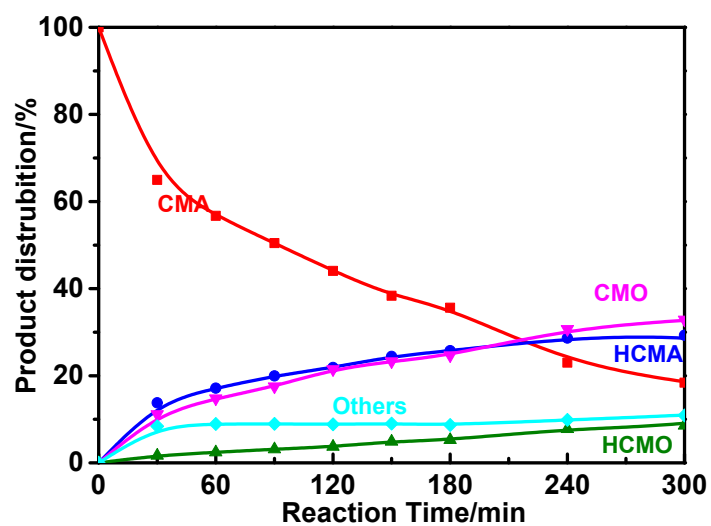

**Figure S3** The variation of the relative concentration with time for the hydrogenation of CMA over  $\text{Pt}_3\text{Sn}/\text{CNTs}$  catalyst prepared by traditional impregnation method (2 MPa  $\text{H}_2$ , 80  $^\circ\text{C}$ ).

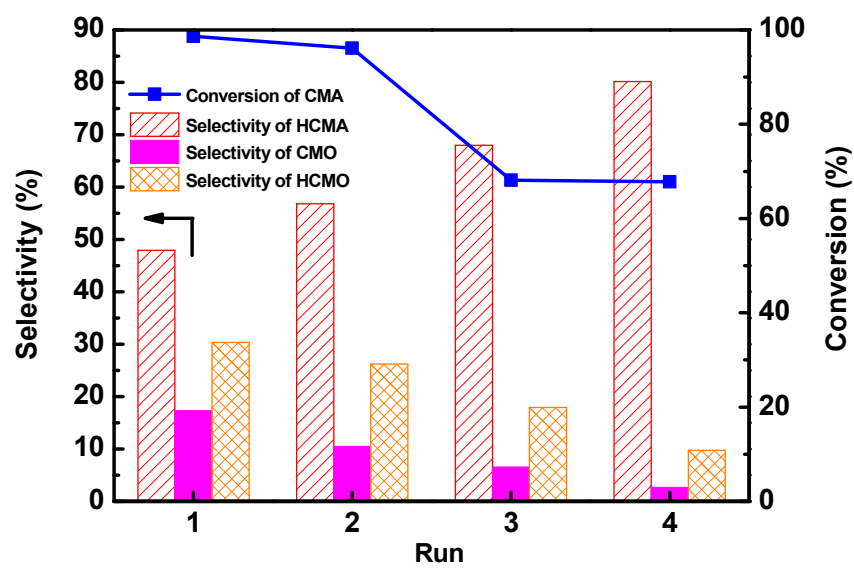

**Figure S4** The stability results of Pt/CNTs catalyst for the hydrogenation of CMA.

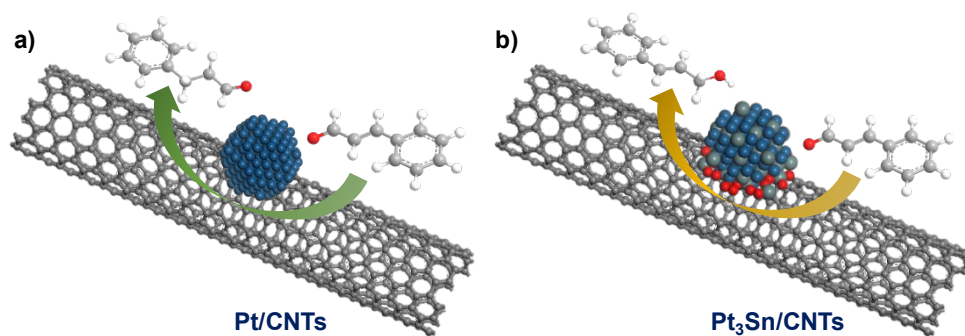

**Figure S5** Schematic representation of the chemoselective hydrogenation of CMA over (a) Pt/CNTs and (b) Pt<sub>3</sub>Sn/CNTs catalysts prepared by LiNaph-driven reduction.

**Table S1** XPS analysis results of Pt 4*f* and Sn 3*d* spectra in asprepared Pt-Sn/CNTs samples.

| Catalyst                | Relative atomic percentage (%) |         |                      |                  |
|-------------------------|--------------------------------|---------|----------------------|------------------|
|                         | Pt <sup>0→δ-</sup>             | Pt-O-Sn | SnO <sub>x</sub> /Sn | SnO <sub>2</sub> |
| Pt/CNTs                 | 100                            | 0       | -                    | -                |
| Pt <sub>3</sub> Sn/CNTs | 65.6                           | 34.4    | 50.7                 | 49.3             |
| Pt-Sn/CNTs              | 69.6                           | 30.4    | 49.3                 | 50.7             |
| PtSn <sub>2</sub> /CNTs | 100                            | 0       | 39.6                 | 60.37            |
| Sn/CNTs                 | -                              | -       | 0                    | 100              |

**Table S2** ICP-AES results of Pt/CNTs and Pt<sub>3</sub>Sn/CNTs catalysts.

| Catalyst                | Pt loading (wt.%) |       | Pt:Sn atom ratios |       |
|-------------------------|-------------------|-------|-------------------|-------|
|                         | Fresh             | Spent | Fresh             | Spent |
| Pt/CNTs                 | 0.68              | 0.32  | -                 | -     |
| Pt <sub>3</sub> Sn/CNTs | 0.53              | 0.49  | 3.13              | 3.06  |
